# Supplementary material
Source: ML conference proceedings conference paper supplement (https://openreview.net/forum?id=rq4v8Ujcec)

CIFAR100: ResIST vs. LSGD

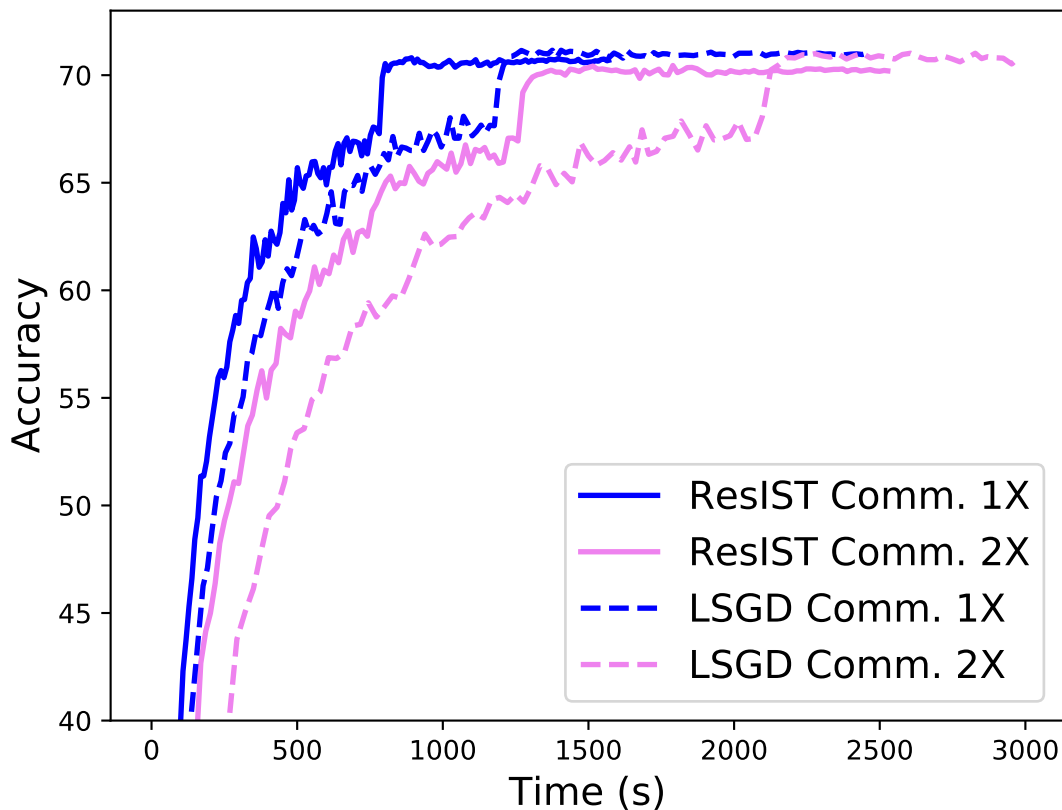

Supplement: supplementary_material [file attachment]

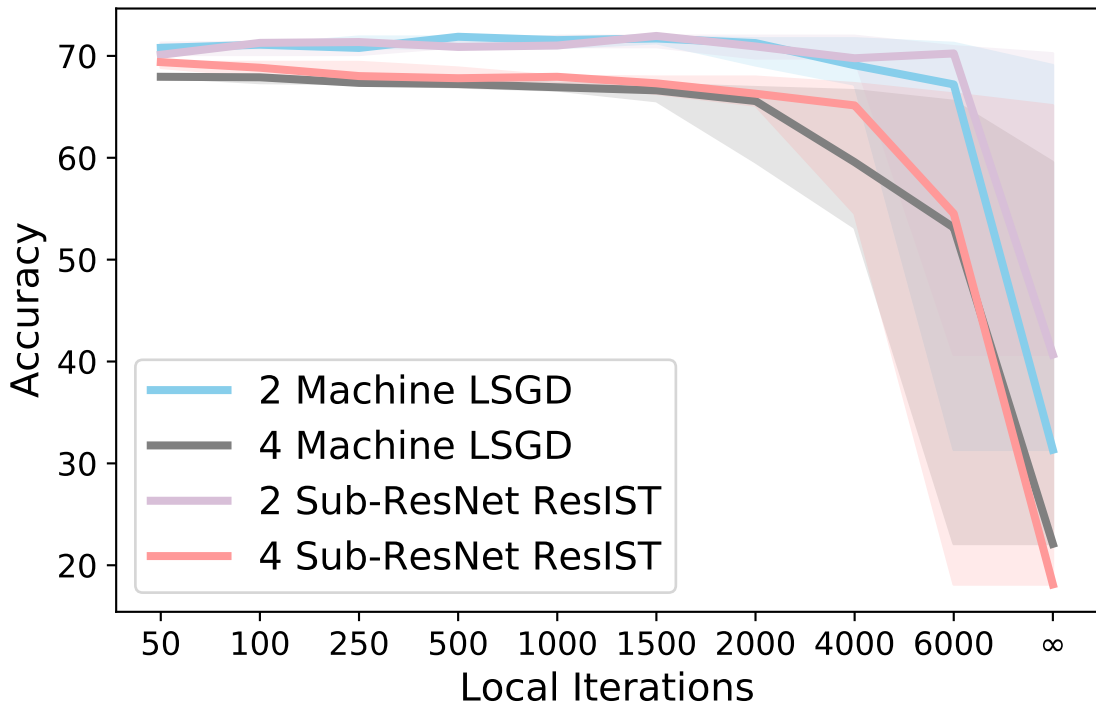

Supplement: supplementary_material [file attachment]

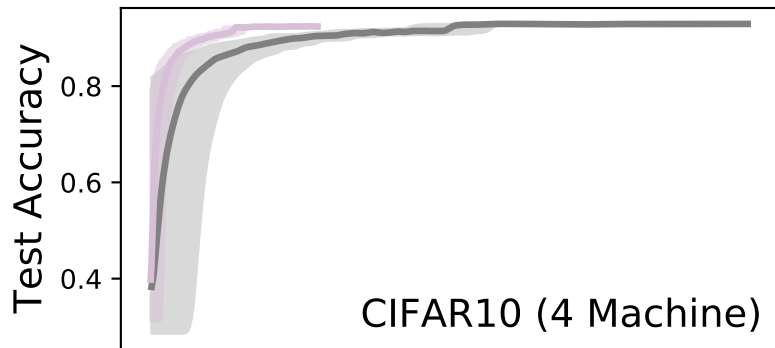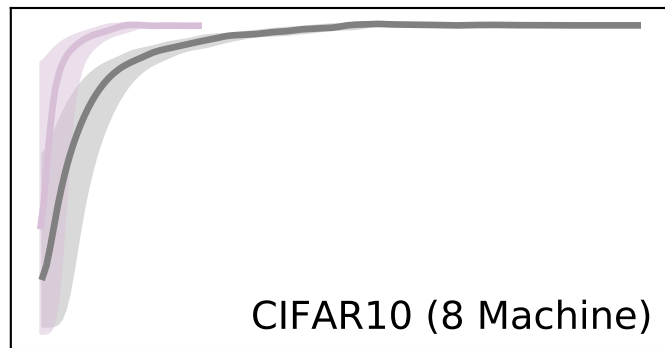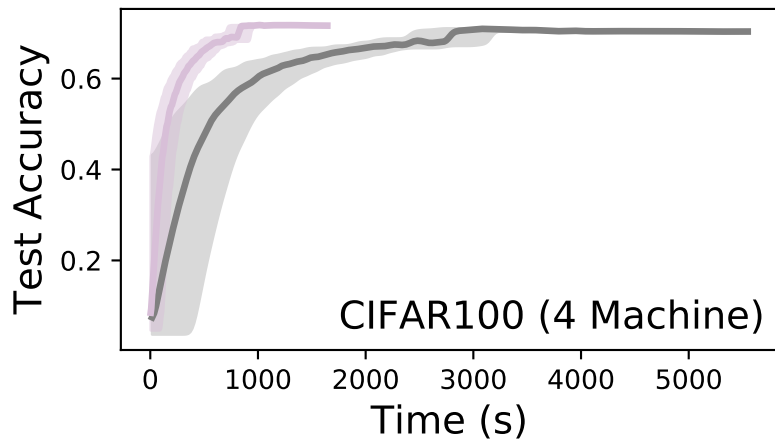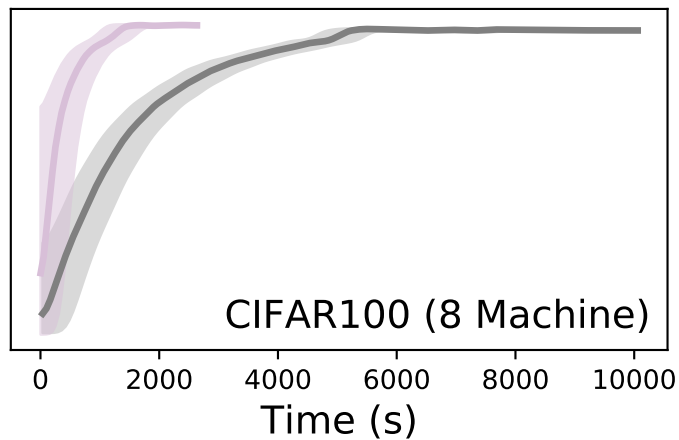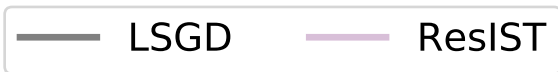

Supplement: supplementary_material [file attachment]

CIFAR10: ResIST vs. LSGD

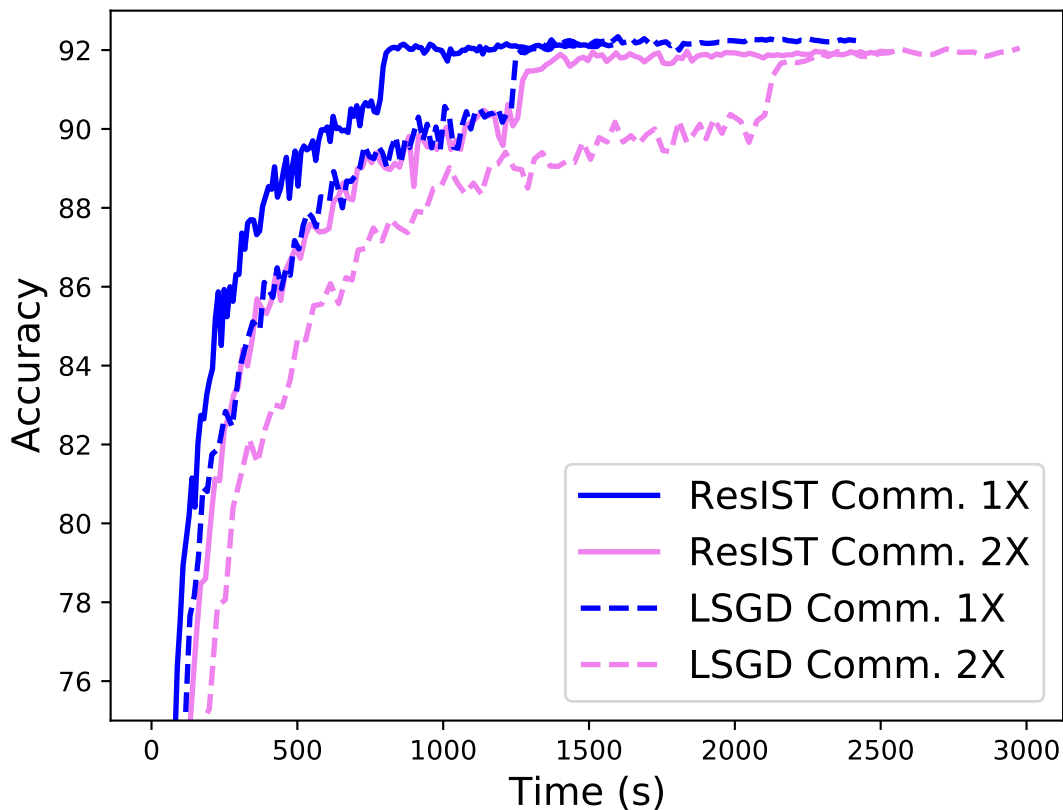

Supplement: supplementary_material [file attachment]
